# Supplementary material
Source: PubMed Central journal article supplement (PMC4530023)
Supplement: NIHMS700885-supplement-1.pdf [file NIHMS700885-supplement-1.pdf]

| Marker  | Clone       | Mass | Type |
|---------|-------------|------|------|
| CD19    | HIB19       | 142  | δ    |
| CD5     | UCHT2       | 143  | δ    |
| *IgG    | G18-145     | 144  | δ    |
| CD4     | RPA-T4      | 145  | β    |
| IgD     | IA6-2       | 146  | δ    |
| CD20    | 2H7         | 147  | δ    |
| CD16    | 3G8         | 148  | β    |
| IgA     | polyclonal  | 148  | α    |
| Igλ     | MHL-38      | 151  | δ    |
| CD45    | HI30        | 154  | δ    |
| CD27    | L128        | 155  | β    |
| *p-PLCγ | K86-6 89.37 | 156  | α    |
| CD33    | MW53        | 158  | β    |
| CD22    | HIB22       | 159  | δ    |
| Igκ     | MHK-49      | 160  | δ    |
| CD79B   | CB3-1       | 162  | β    |
| CD40    | 5C3         | 165  | δ    |
| CD44    | BJ18        | 166  | β    |
| CD38    | HIT2        | 167  | δ    |
| CD8     | SK1         | 168  | δ    |
| CD3     | UCHT1       | 170  | δ    |
| IgM     | MHM-88      | 172  | δ    |
| HLA-DR  | L243        | 174  | δ    |
| **SHP-1 | C14H6       | 175  | β    |
| Iridium | N/A         | 193  | δ    |

Marker Type Key:  
α- Mass cytometry panel 1 only  
β- Mass cytometry panel 2 only  
δ- Both panels

All antibodies were purchased from Fluidigm, unless otherwise specified

\*BD Biosciences antibody

\*\*Cell signaling technology antibody

**Table S1. Mass Cytometry Panels.**

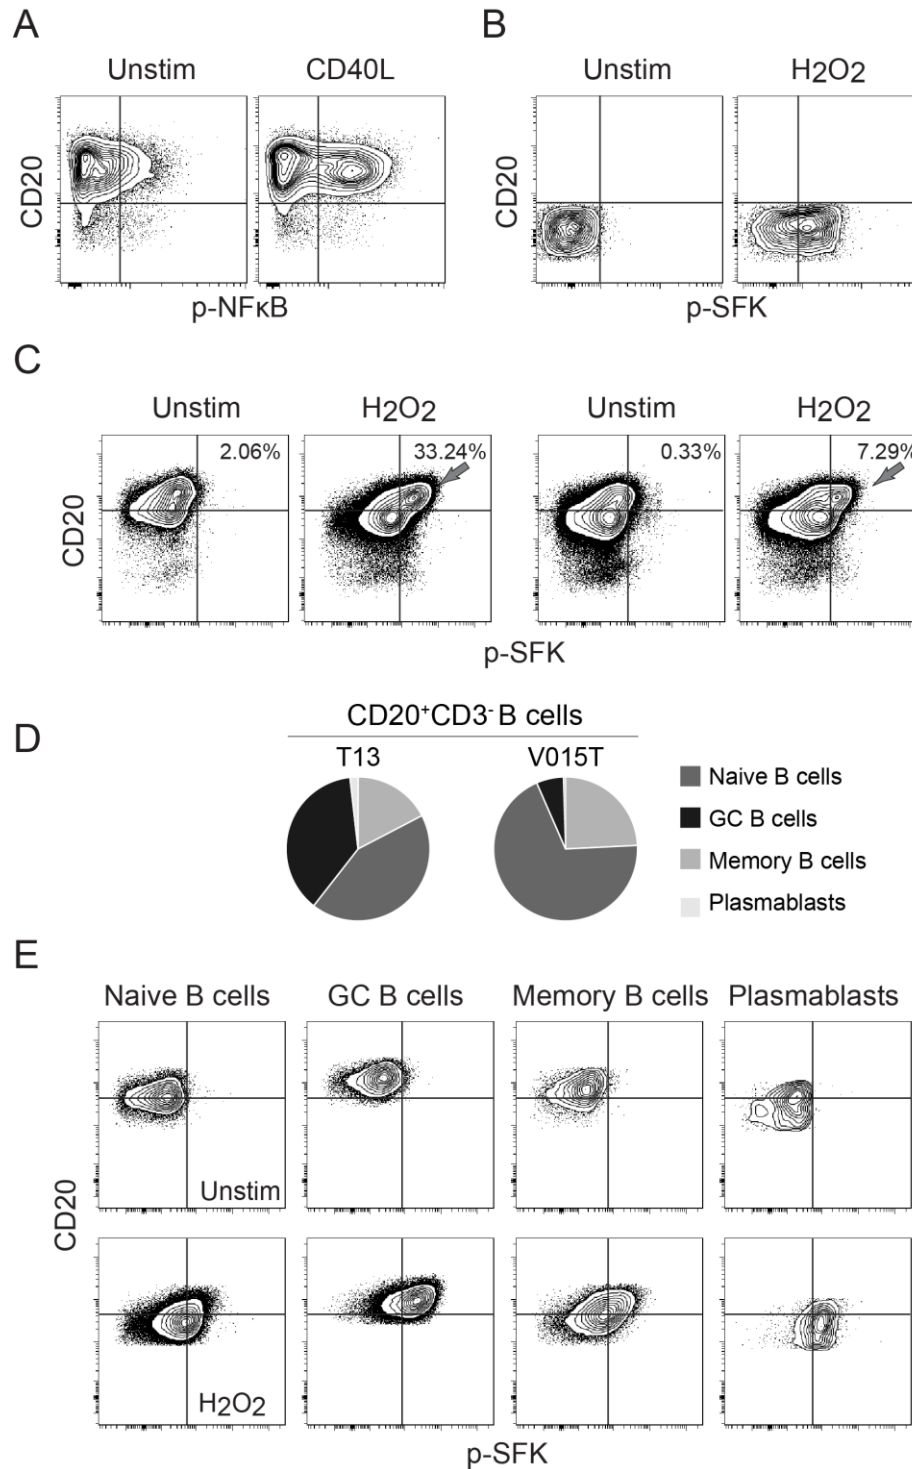

**Supplemental Figure 1.** Populations (CD3<sup>-</sup> cells and CD3<sup>+</sup>CD20<sup>-</sup> cells) defined in figure 1 for A-C and gating schematic for D and E (Naïve B cells, GC B cells, Memory B cells, plasmablasts) shown in figure 3. (A) Contour plots show p-NFκB in unstimulated cells and cells stimulated by CD40L for 15 minutes in CD3<sup>+</sup> cells. (B-D) Cells were either left unstimulated or stimulated by 3.3mM of H<sub>2</sub>O<sub>2</sub> for 2 minutes. (B) Contour plots show p-SFK (i.e. p-LCK) in CD20<sup>+</sup> CD3<sup>+</sup> tonsillar T cells (C) Contour plots show two other CD3<sup>+</sup> healthy tonsil specimens (T13 left-two plots, V015T right-two plots) and their response to H<sub>2</sub>O<sub>2</sub> stimulation. Sensitivity to H<sub>2</sub>O<sub>2</sub> in a CD20<sup>hi</sup> B cell population is indicated (gray arrows). (D) Population portions of identified B cell subsets for two tonsils is shown. (E) Contour plots show raw data for B cell population responses to H<sub>2</sub>O<sub>2</sub> (bottom row). Data for one representative tonsil (T13, n=3) is shown.
